# Supplementary material
Source: ML conference proceedings conference paper supplement (https://openreview.net/forum?id=nBQHTBVnfr)

$$N_1=160, N_2=40$$

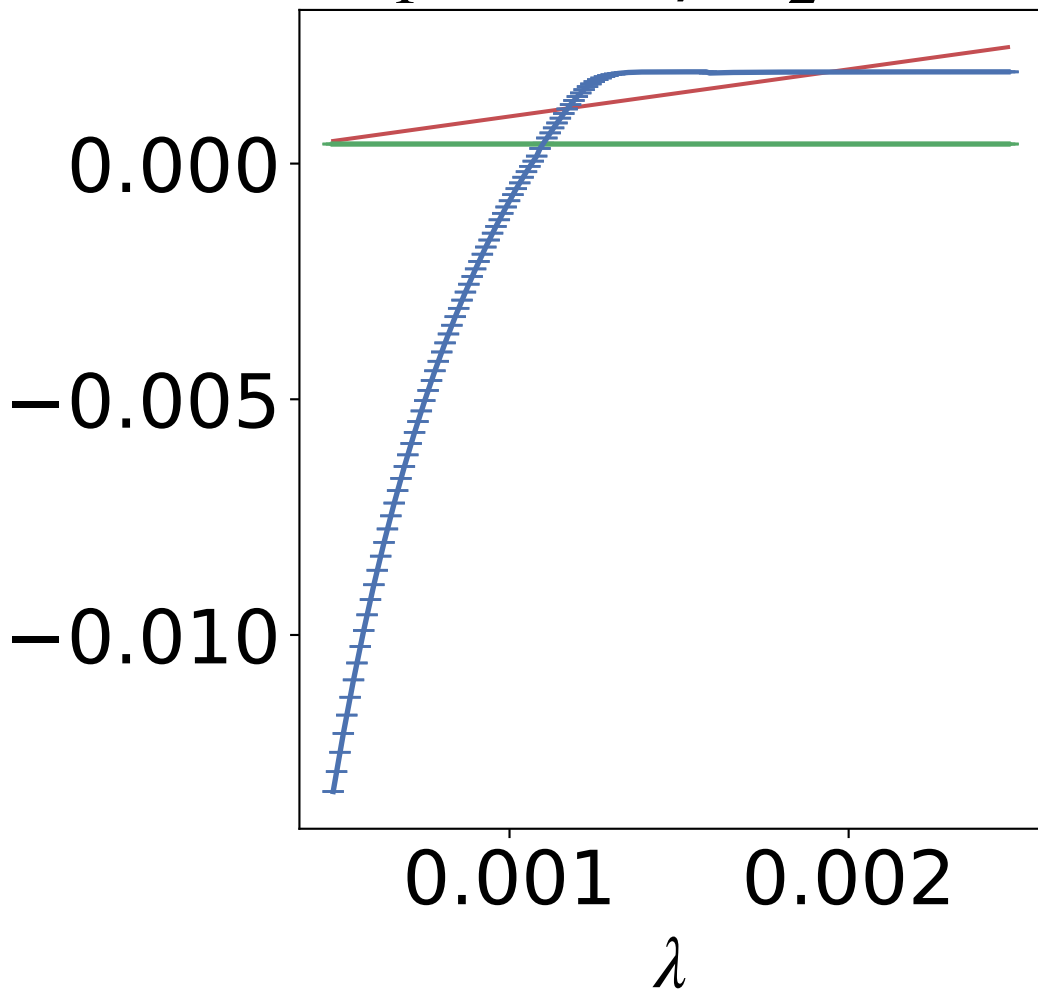

Supplement: supplementary_material [file attachment]

$$N_1=200, N_2=40$$

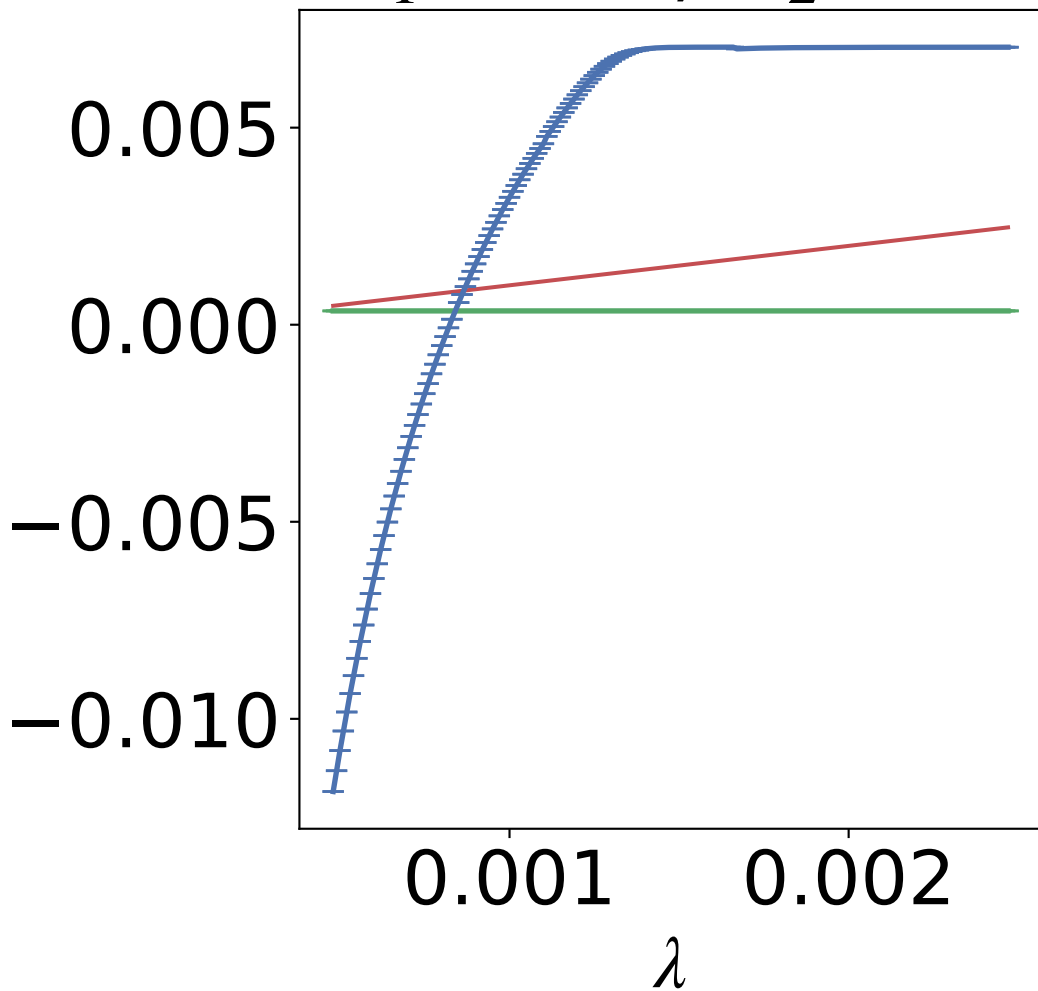

Supplement: supplementary_material [file attachment]

$$N_1=150, N_2=40$$

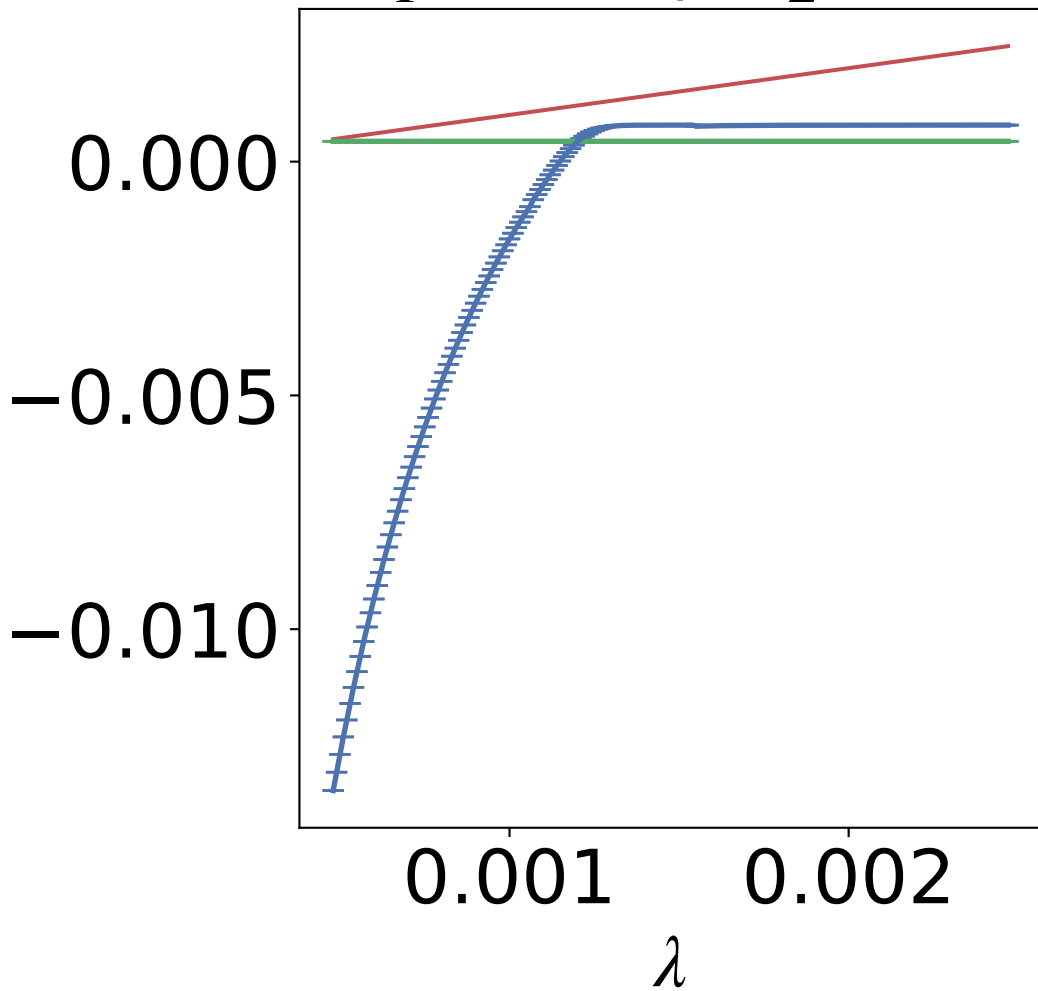

Supplement: supplementary_material [file attachment]

$$\lambda = 2 \cdot \lambda^l$$

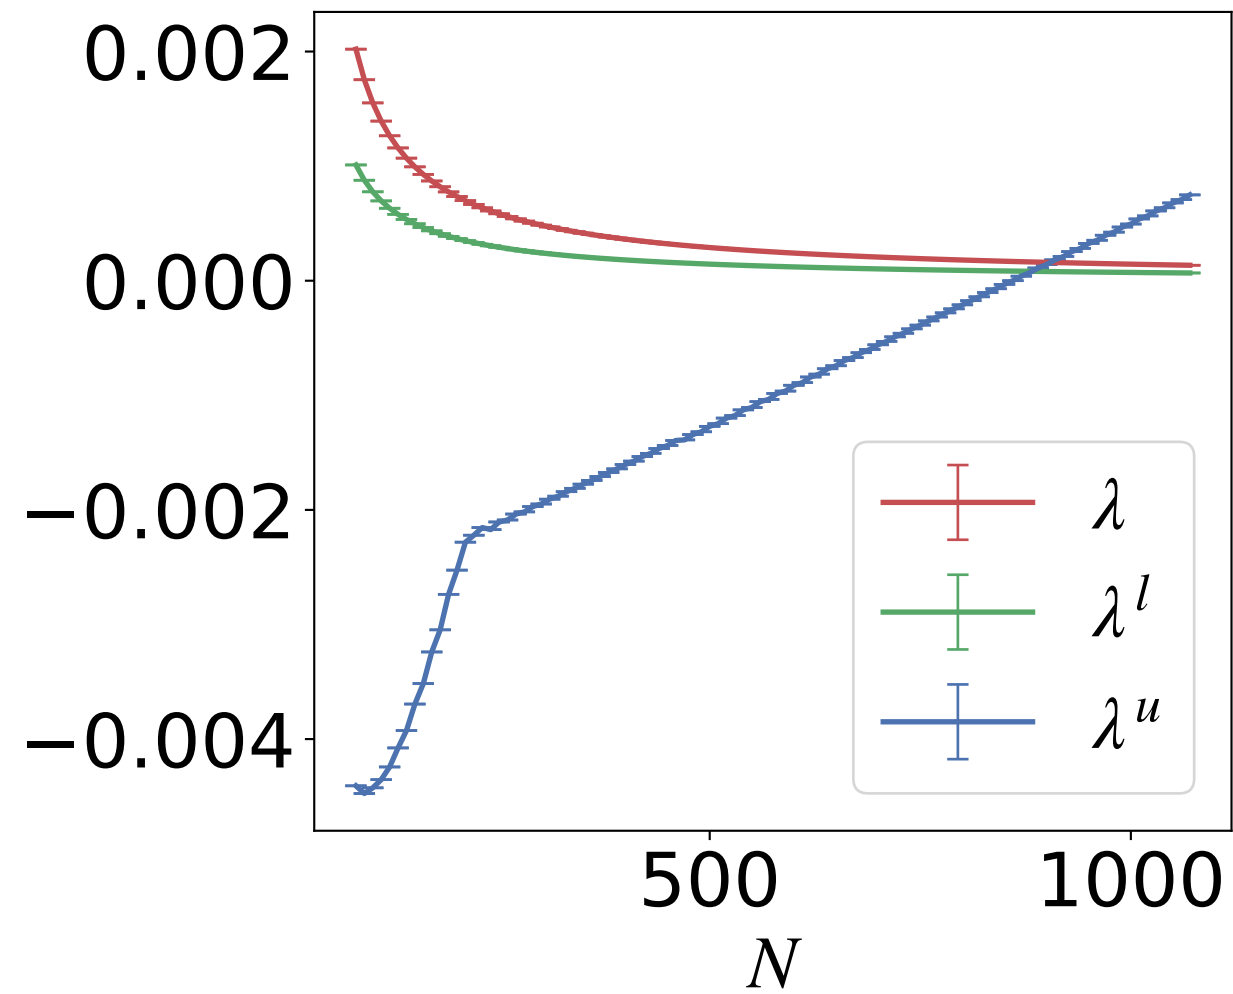

$$\lambda = 5 \cdot \lambda^l$$

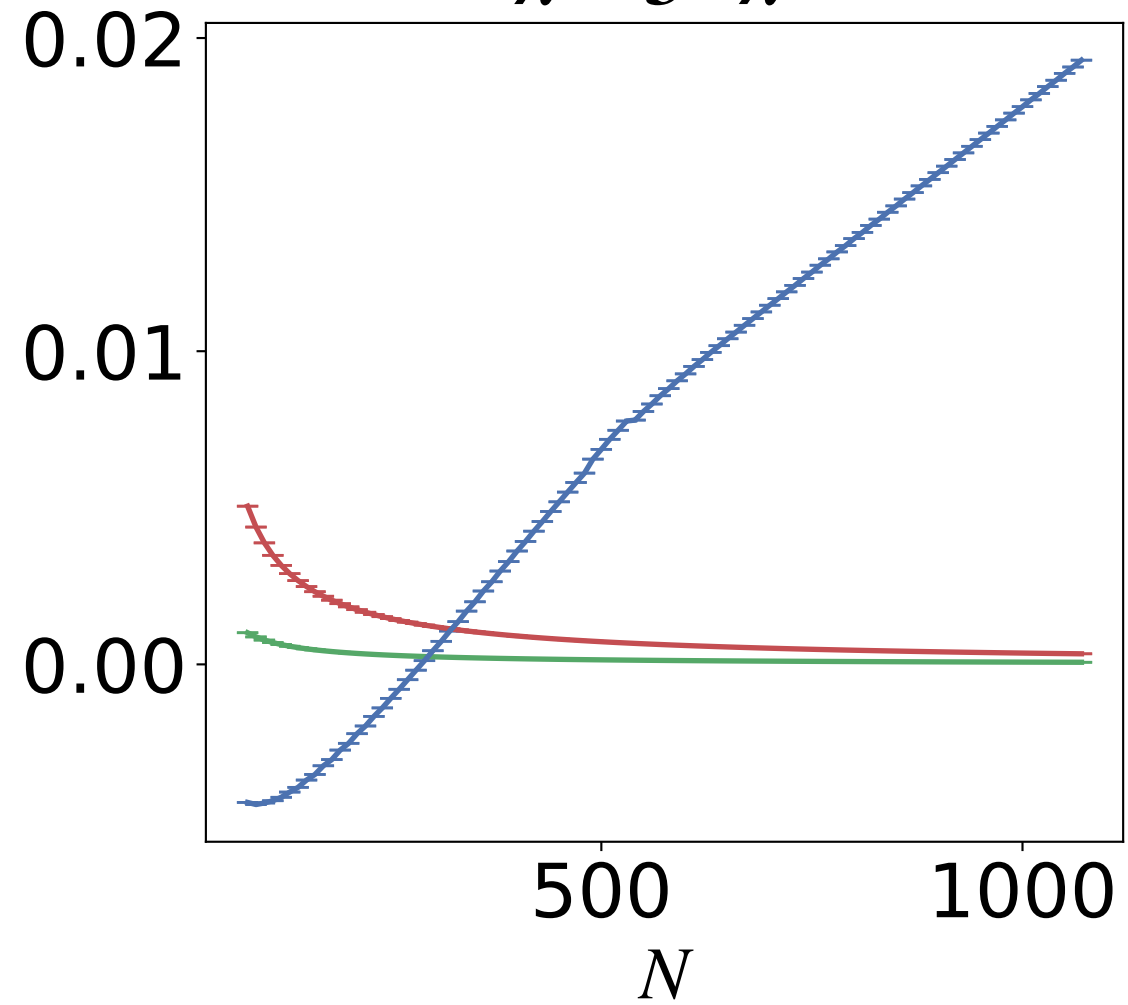

$$\lambda = 50 \cdot \lambda^l$$

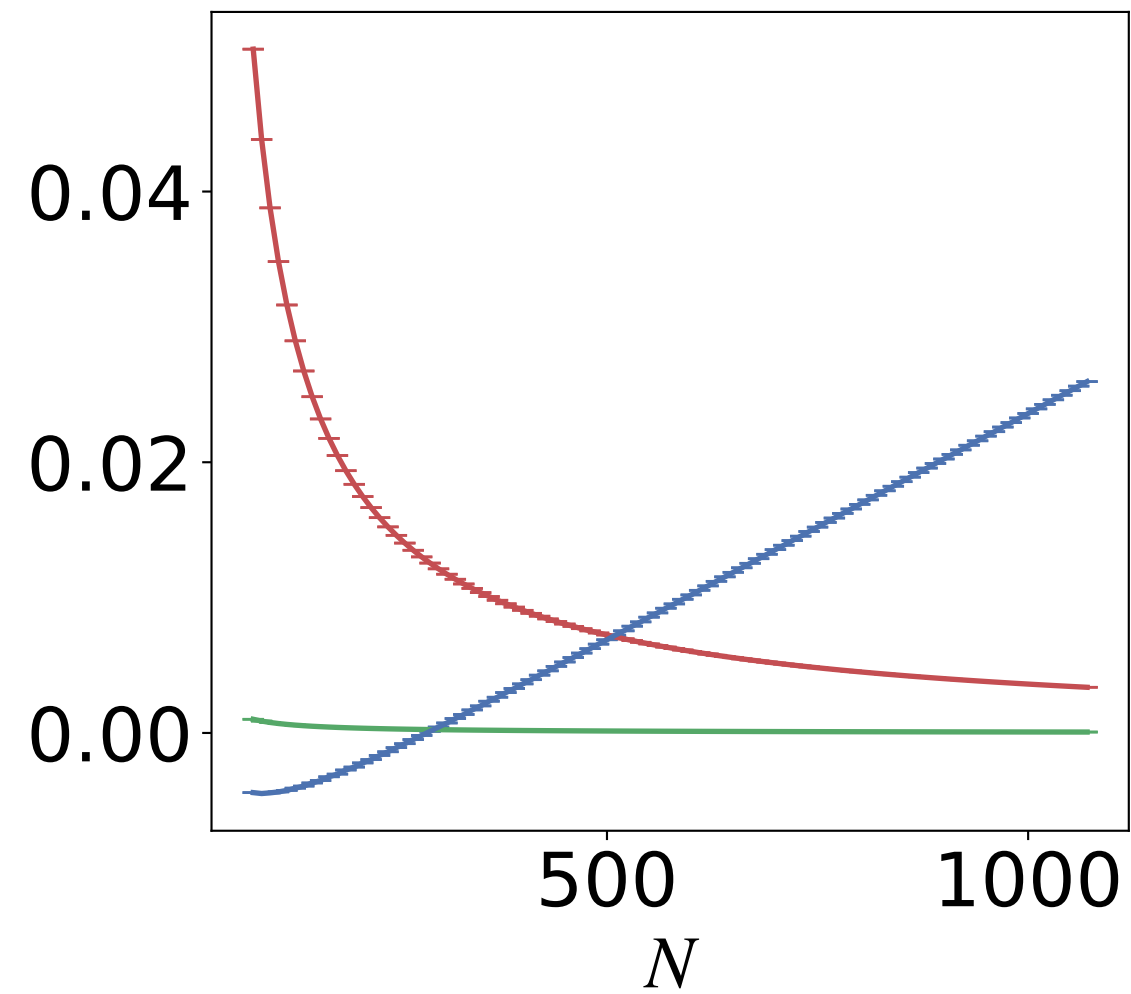

Supplement: supplementary_material [file attachment]

$$N_1=120, N_2=40$$

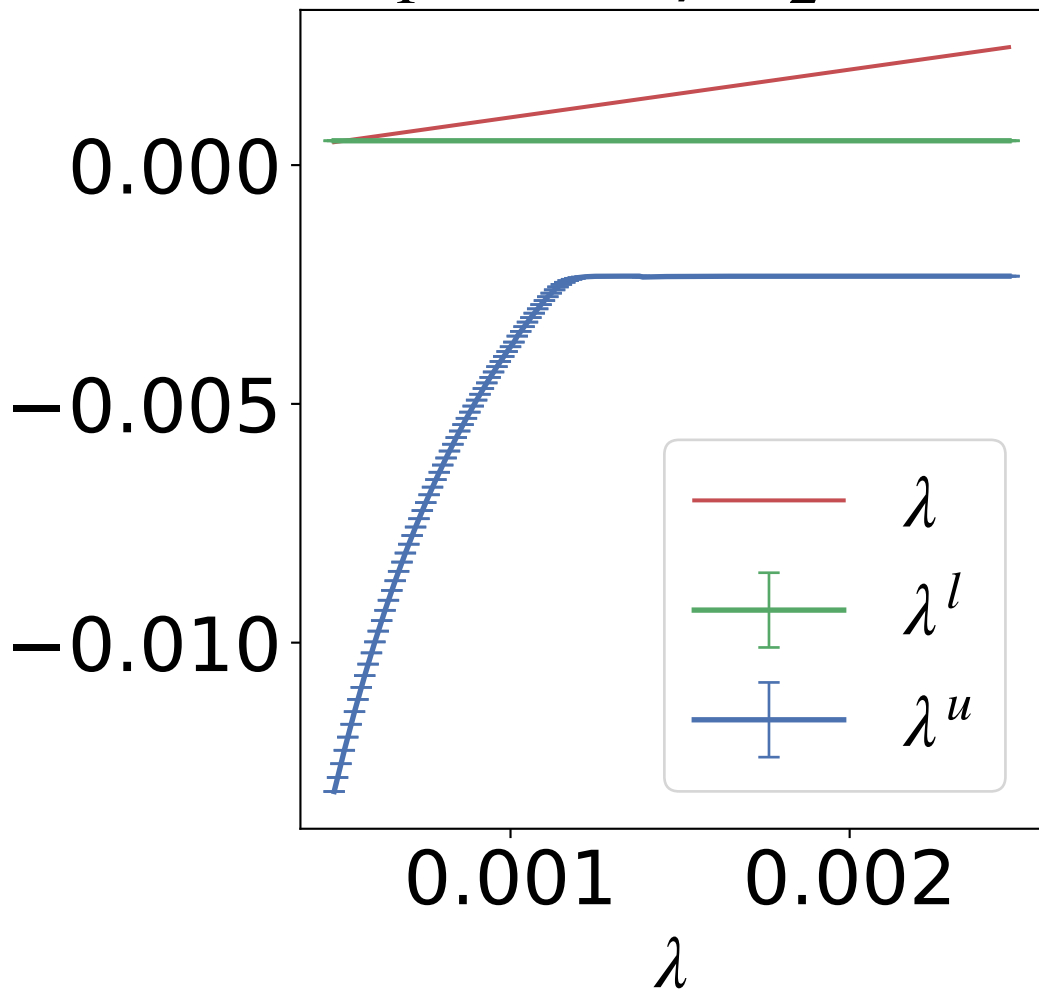

Supplement: supplementary_material [file attachment]
